# Supplementary material for: Temperature Driven Changes in Benthic Bacterial Diversity Influences Biogeochemical Cycling in Coastal Sediments
Source: PubMed Central journal article supplement (PMC6115492; doi:10.3389/fmicb.2018.01730), 2018-08-22
Supplement: Data_Sheet_1.pdf [file Data_Sheet_1.pdf]

## *Supplementary Material*

# **Temperature driven changes in benthic microbial diversity influences biogeochemical cycling under future climate scenarios**

**Natalie Hicks<sup>1\*</sup>, Xuan Liu<sup>2</sup>, Richard Gregory<sup>2</sup>, John Kenny<sup>2</sup>, Anita Lucaci<sup>2</sup>, Luca Lenzi<sup>2</sup>, David M. Paterson<sup>3</sup>, Katherine R. Duncan<sup>4\*</sup>**

<sup>1</sup> The Scottish Association for Marine Science, Scottish Marine Institute, Oban, Argyll, PA37 1QA, UK

<sup>2</sup> Centre for Genomic Research, Institute of Integrative Biology, Biosciences Building, University of Liverpool, Liverpool, L69 7ZB, UK

<sup>3</sup> Sediment Ecology Research Group, Scottish Oceans Institute, School of Biology, University of St Andrews, Fife, KY16 8LB, UK

<sup>4</sup> University of Strathclyde, Strathclyde Institute of Pharmacy and Biomedical Sciences, 161 Cathedral Street, Glasgow, G4 0RE, UK

### **Correspondence:**

Natalie Hicks, [natalie.hicks@sams.ac.uk](mailto:natalie.hicks@sams.ac.uk);

Katherine Duncan, [katherine.duncan@strath.ac.uk](mailto:katherine.duncan@strath.ac.uk)

**Figure S1:** (a) Experimental design showing 18 unique treatments (i) two CO<sub>2</sub> treatments; (ii) three mean temperatures; and (iii) three fluctuation regimes which were repeated in triplicate to yield 54 samples and (b) mean temperature and temporal variability of environmental regimes, each 24 hour period included one complete fluctuation cycle above and below the mean.

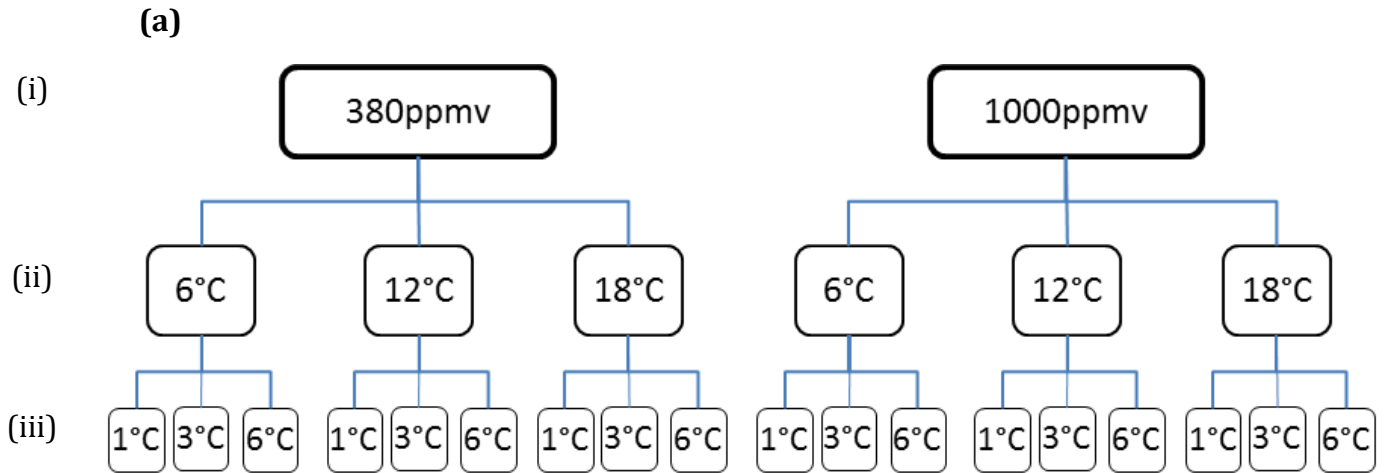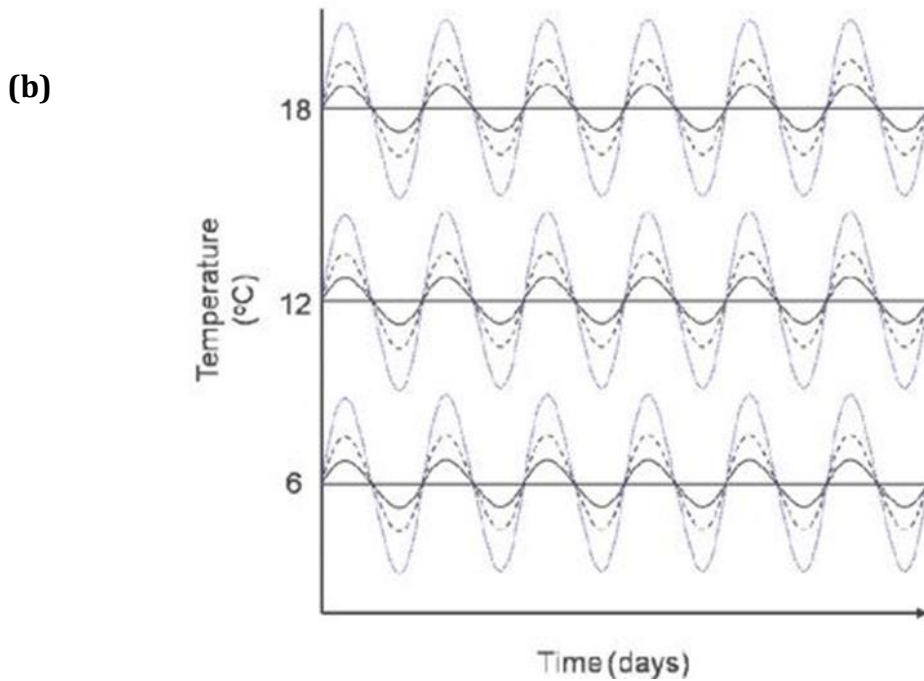

**Table S1:** Summary of sequence data before and after adapter and quality trimming, showing forward (R1) and reverse (R2) read pairs and singlet (RO) reads for all 54 sediment samples.

| Treatment | Nextera Dual Index | Raw Reads | Trimmed Reads <sup>1</sup><br>(%) <sup>2</sup> | R1/R2 Read<br>Pairs <sup>1</sup> | R0 Reads <sup>1</sup><br>(%) <sup>3</sup> |
|-----------|--------------------|-----------|------------------------------------------------|----------------------------------|-------------------------------------------|
| L6-1a     | GTAGAGGA-TAGATCGC  | 470,438   | 469,841 (99.87)                                | 234,628                          | 585 (0.12)                                |
| L6-1b     | GTAGAGGA-CTCTCTAT  | 416,692   | 416,254 (99.89)                                | 207,908                          | 438 (0.11)                                |
| L6-1c     | GTAGAGGA-TATCCTCT  | 449,666   | 449,201 (99.90)                                | 224,368                          | 465 (0.10)                                |
| H6-3a     | GTAGAGGA-AGAGTAGA  | 473,564   | 472,651 (99.81)                                | 236,053                          | 545 (0.12)                                |
| H6-3b     | GTAGAGGA-GTAAGGAG  | 497,076   | 496,230 (99.83)                                | 247,830                          | 570 (0.11)                                |
| H6-3c     | GTAGAGGA-ACTGCATA  | 409,498   | 409,117 (99.91)                                | 204,369                          | 379 (0.09)                                |
| L6-6a     | GTAGAGGA-AAGGAGTA  | 354,918   | 354,205 (99.80)                                | 176,884                          | 437 (0.12)                                |
| L6-6b     | GTAGAGGA-CTAAGCCT  | 376,416   | 375,939 (99.87)                                | 187,732                          | 475 (0.13)                                |
| L6-6c     | AAGAGGCA-TAGATCGC  | 416,744   | 416,276 (99.89)                                | 207,906                          | 464 (0.11)                                |
| H6-1a     | AAGAGGCA-CTCTCTAT  | 373,780   | 373,436 (99.91)                                | 186,547                          | 342 (0.09)                                |
| H6-1b     | AAGAGGCA-TATCCTCT  | 384,914   | 384,526 (99.90)                                | 192,070                          | 386 (0.10)                                |
| H6-1c     | AAGAGGCA-AGAGTAGA  | 349,680   | 348,984 (99.80)                                | 174,291                          | 402 (0.12)                                |
| L6-3a     | AAGAGGCA-GTAAGGAG  | 422,000   | 421,264 (99.83)                                | 210,399                          | 466 (0.11)                                |
| L6-3b     | AAGAGGCA-ACTGCATA  | 357,616   | 357,277 (99.91)                                | 178,469                          | 339 (0.09)                                |
| L6-3c     | AAGAGGCA-AAGGAGTA  | 483,136   | 482,291 (99.83)                                | 240,897                          | 497 (0.10)                                |
| H6-6a     | AAGAGGCA-CTAAGCCT  | 430,026   | 429,583 (99.90)                                | 214,570                          | 443 (0.10)                                |
| H6-6b     | CGAGGCTG-TAGATCGC  | 346,426   | 346,044 (99.89)                                | 172,834                          | 376 (0.11)                                |
| H6-6c     | CGAGGCTG-CTCTCTAT  | 456,078   | 455,587 (99.89)                                | 227,548                          | 491 (0.11)                                |
| H12-3a    | CGAGGCTG-TATCCTCT  | 751,066   | 750,278 (99.90)                                | 374,748                          | 782 (0.10)                                |
| H12-3b    | CGAGGCTG-AGAGTAGA  | 463,930   | 463,358 (99.88)                                | 231,398                          | 562 (0.12)                                |
| H12-3c    | CGAGGCTG-GTAAGGAG  | 472,896   | 472,342 (99.88)                                | 235,908                          | 526 (0.11)                                |
| L12-1a    | CGAGGCTG-ACTGCATA  | 402,448   | 401,995 (99.89)                                | 200,773                          | 449 (0.11)                                |
| L12-1b    | CGAGGCTG-AAGGAGTA  | 467,026   | 466,435 (99.87)                                | 232,927                          | 581 (0.12)                                |
| L12-1c    | CGAGGCTG-CTAAGCCT  | 405,130   | 404,605 (99.87)                                | 202,044                          | 517 (0.13)                                |
| H12-1a    | GCTACGCT-TAGATCGC  | 421,538   | 421,173 (99.91)                                | 210,408                          | 357 (0.08)                                |
| H12-1b    | GCTACGCT-CTCTCTAT  | 449,600   | 449,215 (99.91)                                | 224,416                          | 383 (0.09)                                |
| H12-1c    | GCTACGCT-TATCCTCT  | 422,858   | 422,520 (99.92)                                | 211,092                          | 336 (0.08)                                |
| L12-6a    | GCTACGCT-AGAGTAGA  | 391,212   | 390,900 (99.92)                                | 195,298                          | 304 (0.08)                                |
| L12-6b    | GCTACGCT-GTAAGGAG  | 487,232   | 486,839 (99.92)                                | 243,224                          | 391 (0.08)                                |
| L12-6c    | GCTACGCT-ACTGCATA  | 452,550   | 452,165 (99.91)                                | 225,891                          | 383 (0.08)                                |
| L12-3a    | GCTACGCT-AAGGAGTA  | 538,220   | 537,775 (99.92)                                | 268,669                          | 437 (0.08)                                |
| L12-3b    | GCTACGCT-CTAAGCCT  | 435,300   | 434,859 (99.90)                                | 217,211                          | 437 (0.10)                                |
| L12-3c    | CAGAGAGG-TAGATCGC  | 336,196   | 335,887 (99.91)                                | 167,790                          | 307 (0.09)                                |
| H12-6a    | CAGAGAGG-CTCTCTAT  | 381,304   | 380,953 (99.91)                                | 190,302                          | 349 (0.09)                                |
| H12-6b    | CAGAGAGG-TATCCTCT  | 443,978   | 443,601 (99.92)                                | 221,614                          | 373 (0.08)                                |
| H12-6c    | CAGAGAGG-AGAGTAGA  | 375,458   | 374,673 (99.79)                                | 187,112                          | 449 (0.12)                                |

## Supplementary Material

|        |                   |           |                   |         |            |
|--------|-------------------|-----------|-------------------|---------|------------|
| L18-1a | CAGAGAGG-GTAAGGAG | 509,020   | 508,165 (99.83)   | 253,797 | 571 (0.11) |
| L18-1b | CAGAGAGG-ACTGCATA | 477,902   | 477,456 (99.91)   | 238,506 | 444 (0.09) |
| L18-1c | CAGAGAGG-AAGGAGTA | 598,110   | 597,048 (99.82)   | 298,197 | 654 (0.11) |
| H18-3a | CAGAGAGG-CTAAGCCT | 360,804   | 360,435 (99.90)   | 180,035 | 365 (0.10) |
| H18-3b | TAGGCATG-TAGATCGC | 810       | 637 (78.64)       | 312     | 13 (2.04)  |
| H18-3c | TAGGCATG-CTCTCTAT | 413,530   | 413,154 (99.91)   | 206,391 | 372 (0.09) |
| H18-6a | TAGGCATG-TATCCTCT | 378,900   | 378,548 (99.91)   | 189,100 | 348 (0.09) |
| H18-6b | TAGGCATG-AGAGTAGA | 469,864   | 469,392 (99.90)   | 234,473 | 446 (0.10) |
| H18-6c | TAGGCATG-GTAAGGAG | 562,372   | 561,851 (99.91)   | 280,692 | 467 (0.08) |
| L18-3a | TAGGCATG-ACTGCATA | 530,776   | 530,354 (99.92)   | 264,966 | 422 (0.08) |
| L18-3b | TAGGCATG-AAGGAGTA | 659,600   | 658,995 (99.91)   | 329,221 | 553 (0.08) |
| L18-3c | TAGGCATG-CTAAGCCT | 527,752   | 527,302 (99.91)   | 263,426 | 450 (0.09) |
| H18-1a | CTCTCTAC-TAGATCGC | 470,210   | 469,803 (99.91)   | 234,701 | 401 (0.09) |
| H18-1b | CTCTCTAC-CTCTCTAT | 352,674   | 352,383 (99.92)   | 176,046 | 291 (0.08) |
| H18-1c | CTCTCTAC-TATCCTCT | 558,402   | 557,930 (99.92)   | 278,729 | 472 (0.08) |
| L18-6a | CTCTCTAC-AGAGTAGA | 1,108,812 | 1,107,840 (99.91) | 553,439 | 962 (0.09) |
| L18-6b | CTCTCTAC-GTAAGGAG | 149,350   | 149,199 (99.90)   | 74,524  | 151 (0.10) |
| L18-6c | CTCTCTAC-ACTGCATA | 508       | 502 (98.82)       | 248     | 6 (1.20)   |

<sup>1</sup> After adapter and quality trimming.

<sup>2</sup> Percentage of the reads remaining after adapter and quality trimming.

<sup>3</sup> Percentage of the trimmed reads that are singletons.

**Table S2:** Summary of sequences aligned to any of the newly defined OTUs.

| Sample | Number of sequences | Number of sequences aligned to any taxa (%) |
|--------|---------------------|---------------------------------------------|
| L6-1a  | 233,079             | 224,972 (96.52)                             |
| L6-1b  | 206,654             | 200,239 (96.90)                             |
| L6-1c  | 222,867             | 216,582 (97.18)                             |
| H6-3a  | 234,495             | 225,508 (96.17)                             |
| H6-3b  | 246,354             | 238,111 (96.65)                             |
| H6-3c  | 203,131             | 196,827 (96.90)                             |
| L6-6a  | 175,847             | 171,070 (97.28)                             |
| L6-6b  | 186,586             | 181,699 (97.38)                             |
| L6-6c  | 206,428             | 199,807 (96.79)                             |
| H6-1a  | 185,303             | 179,797 (97.03)                             |
| H6-1b  | 190,821             | 185,351 (97.13)                             |
| H6-1c  | 172,897             | 167,522 (96.89)                             |
| L6-3a  | 209,227             | 201,419 (96.27)                             |
| L6-3b  | 177,165             | 169,863 (95.88)                             |
| L6-3c  | 239,575             | 230,603 (96.26)                             |
| H6-6a  | 213,272             | 204,641 (95.95)                             |
| H6-6b  | 171,816             | 161,862 (94.21)                             |
| H6-6c  | 226,270             | 219,962 (97.21)                             |
| H12-3a | 372,525             | 359,757 (96.57)                             |
| H12-3b | 229,830             | 223,337 (97.17)                             |
| H12-3c | 234,335             | 226,636 (96.71)                             |
| L12-1a | 199,436             | 193,818 (97.18)                             |
| L12-1b | 231,452             | 224,314 (96.92)                             |
| L12-1c | 200,733             | 193,784 (96.54)                             |
| H12-1a | 209,160             | 203,199 (97.15)                             |
| H12-1b | 223,185             | 216,025 (96.79)                             |
| H12-1c | 209,678             | 203,797 (97.20)                             |
| L12-6a | 193,959             | 187,099 (96.46)                             |
| L12-6b | 241,742             | 234,179 (96.87)                             |
| L12-6c | 224,182             | 217,494 (97.02)                             |
| L12-3a | 267,072             | 260,237 (97.44)                             |
| L12-3b | 215,877             | 211,268 (97.86)                             |
| L12-3c | 166,223             | 162,130 (97.54)                             |
| H12-6a | 189,117             | 182,936 (96.73)                             |
| H12-6b | 220,290             | 213,680 (97.00)                             |
| H12-6c | 185,785             | 177,992 (95.81)                             |
| L18-1a | 252,156             | 244,323 (96.89)                             |
| L18-1b | 236,919             | 229,456 (96.85)                             |
| L18-1c | 296,265             | 287,235 (96.95)                             |
| H18-3a | 178,821             | 172,904 (96.69)                             |
| H18-3b | 80                  | 52 (65)                                     |
| H18-3c | 205,103             | 197,131 (96.11)                             |
| H18-6a | 187,715             | 180,607 (96.21)                             |
| H18-6b | 232,648             | 224,862 (96.65)                             |
| H18-6c | 278,935             | 269,764 (96.71)                             |
| L18-3a | 262,995             | 254,026 (96.59)                             |
| L18-3b | 327,129             | 318,350 (97.32)                             |
| L18-3c | 261,653             | 254,576 (97.30)                             |
| H18-1a | 232,941             | 226,464 (97.22)                             |
| H18-1b | 174,826             | 169,793 (97.12)                             |
| H18-1c | 276,836             | 268,880 (97.13)                             |
| L18-6a | 549,668             | 532,309 (96.84)                             |
| L18-6b | 74,063              | 71,691 (96.80)                              |
| L18-6c | 213                 | 148 (69.48)                                 |

**Table S3:** Major species (OTUs) for all treatments listed by taxon. Filled cells indicate absence of species in that sample.

| Taxa                         | L6-1a  | L6-1b  | L6-1c  | L6-6a | L6-6b  | L6-6c  | L6-3a  | L6-3b  | L6-3c  | L12-1a | L12-1b | L12-1c | L12-6a | L12-6b | L12-6c | L12-3a | L12-3b | L12-3c | L18-1a | L18-1b | L18-1c | L18-3a | L18-3b | L18-3c | L18-6a | L18-6b |      |
|------------------------------|--------|--------|--------|-------|--------|--------|--------|--------|--------|--------|--------|--------|--------|--------|--------|--------|--------|--------|--------|--------|--------|--------|--------|--------|--------|--------|------|
| Bacteria                     | 4639   | 4831   | 4216   | 3119  | 2768   | 3185   | 3155   | 3415   | 3593   | 2411   | 4496   | 4640   | 1939   | 2664   | 3443   | 5343   | 3359   | 3288   | 4926   | 5142   | 6277   | 5003   | 5015   | 4347   | 5997   | 949    |      |
| Bacteroidetes                |        | 2142   |        | 1860  |        |        |        |        |        |        |        | 1949   |        |        |        |        |        |        |        |        |        |        |        |        |        |        |      |
| Bacteroidales                |        |        |        |       |        |        |        |        |        |        |        |        |        |        |        |        |        |        |        |        |        |        |        |        |        |        |      |
| Bacteroidales                |        |        |        |       |        |        |        |        |        |        |        | 2265   |        |        |        |        |        |        |        |        |        |        |        |        |        | 3152   |      |
| Flammeovirgaceae             |        |        |        |       |        |        |        |        |        |        |        |        |        |        |        |        |        |        |        |        |        |        |        |        |        |        |      |
| SB-1                         |        | 2251   |        | 1724  |        | 2175   | 2321   |        |        |        | 3929   | 2091   |        |        |        |        |        |        |        |        |        |        |        |        |        |        |      |
| Flavobacteriaceae            | 20111  | 12722  | 15270  | 13396 | 17617  | 18541  | 22475  | 16989  | 24834  | 20102  | 17070  | 16895  | 20734  | 24087  | 20929  | 15272  | 11427  | 8450   | 16757  | 15135  | 19012  | 15815  | 24338  | 17617  | 44585  | 5799   |      |
| <i>Eudoraea adriatica</i>    | 21434  | 16759  | 20303  | 12609 | 16208  | 14042  | 15290  | 12157  | 18856  | 13622  | 12366  | 12944  | 14557  | 15099  | 16118  | 25553  | 26081  | 19609  | 13976  | 10590  | 12130  | 8227   | 16498  | 15541  | 29618  | 4749   |      |
| <i>Lutibacter</i> sp.        |        |        |        |       |        | 2216   | 2373   | 1746   | 2582   |        |        |        |        |        |        |        |        |        |        |        |        |        |        |        |        |        |      |
| <i>Lutibacter altoralis</i>  | 4638   | 3468   | 3421   |       |        |        |        |        |        |        |        | 4131   |        |        |        |        |        |        |        |        |        |        |        |        |        |        |      |
| <i>Lutimonas</i> sp.         | 2580   |        | 2178   | 1961  | 2710   | 2720   | 3689   | 2330   | 3966   | 2245   |        |        | 2816   | 3206   | 2471   |        |        |        |        |        |        |        |        |        |        | 6222   | 1062 |
| <i>Robiginitalea</i> sp.     | 7742   | 3586   | 4623   | 4001  | 9056   | 7448   | 11607  | 7270   | 11904  | 12803  | 7900   | 4515   | 25036  | 28889  | 17686  | 46338  | 48384  | 39910  | 33147  | 26629  | 33372  | 32009  | 47947  | 42569  | 110339 | 13610  |      |
| <i>Ulvibacter</i> sp.        |        |        |        | 2314  | 2289   | 2616   | 2153   | 2294   | 2736   |        |        |        |        |        |        |        |        |        |        |        |        |        |        |        |        |        |      |
| Saprospiraceae               | 7210   | 5915   | 6814   | 5844  | 5920   | 6626   | 5287   | 4956   | 6700   | 4488   | 5273   | 5641   | 3428   | 4598   | 5130   | 6026   | 4231   | 2926   | 5898   | 5942   | 7198   | 4762   | 6047   | 4633   | 10567  | 1744   |      |
| CFB-26                       |        |        |        |       |        |        |        |        |        |        |        |        |        |        |        |        |        |        |        |        |        |        |        |        |        |        |      |
| Caldilineaceae               |        |        |        |       |        |        |        |        |        |        |        |        |        |        |        |        |        |        |        | 3587   | 2847   | 3799   | 2798   | 3998   |        | 7066   |      |
| GCA004                       | 11162  | 10354  | 8939   | 4919  | 4141   | 5781   | 5383   | 5556   | 6308   | 6927   | 9025   | 11796  | 4680   | 6466   | 5870   | 7368   | 3643   | 4846   | 9995   | 10223  | 13735  | 12880  | 13145  | 8735   | 9619   | 2045   |      |
| Ellin6529                    |        |        |        |       |        |        |        |        |        |        |        |        |        |        |        |        |        |        |        |        |        |        |        |        |        |        |      |
| A4b                          | 2672   | 3102   | 2842   | 2185  | 2525   | 3037   |        | 1873   |        |        |        | 3195   |        |        |        | 3049   |        | 2646   | 3658   | 3298   | 4310   | 3718   | 4668   | 3597   |        |        |      |
| Stramenopiles                |        |        |        |       |        |        | 3635   | 3318   | 3620   |        | 3671   | 2081   |        |        |        |        |        |        |        |        |        |        |        |        |        |        |      |
| <i>Planktothrix</i> sp.      |        |        |        |       |        |        |        |        |        |        |        |        |        |        |        | 13258  | 13413  | 5770   |        |        |        |        |        |        |        |        |      |
| CL500-15                     |        |        |        |       |        |        |        |        |        | 2148   |        |        |        |        |        |        |        |        |        |        |        |        | 2872   |        | 3191   | 726    |      |
| agg27                        |        | 2100   |        |       |        |        |        | 1945   | 2425   |        |        |        |        |        |        |        |        |        |        | 2911   | 2308   | 1941   | 2497   |        |        |        |      |
| Phycisphaerales              | 3036   | 3572   | 3164   | 2052  | 1945   |        | 2393   | 2335   | 3338   | 2793   | 2729   | 2464   |        |        | 2234   | 4314   | 2976   | 2628   | 3421   | 3189   | 4297   | 3019   | 3434   |        |        | 819    |      |
| Phycisphaeraeaceae           |        |        |        | 1819  | 1919   |        | 2289   |        | 2736   | 3834   | 2433   |        |        |        |        |        |        |        |        | 2778   |        |        |        |        |        |        |      |
| Pirellulaceae                |        |        |        |       |        |        |        |        |        |        |        | 1898   |        |        |        | 3384   | 2668   | 2163   | 3404   | 3388   | 4158   | 3297   | 4345   |        | 6310   | 1049   |      |
| Rhodobacteraceae             | 3459   | 2127   | 3585   | 2859  | 3410   | 3551   | 3390   | 1955   | 3622   | 3878   | 3185   | 2675   | 4344   | 6404   |        | 5471   | 4751   | 2944   | 5329   | 3948   | 4214   | 6971   | 9477   | 9672   | 16688  | 1878   |      |
| <i>Loktanello</i> sp.        | 3853   | 2251   | 4458   | 3796  | 5387   | 4975   | 4287   | 2921   | 4386   | 5699   | 3534   | 2266   | 5142   | 6730   | 2393   | 3757   | 4372   | 2552   | 3609   | 2747   | 3107   | 2816   | 7635   | 4651   | 13811  | 1344   |      |
| <i>Hydrogenophaga</i> sp.    |        |        |        | 2738  | 2808   | 2903   |        |        |        |        |        |        |        |        |        |        |        |        |        |        |        |        |        |        |        |        |      |
| <i>Methylotenera mobilis</i> |        |        |        |       | 2063   |        |        |        |        |        |        |        |        |        |        |        |        | 2126   |        |        |        |        |        |        |        |        |      |
| Desulfobacteraceae           |        |        |        |       |        |        |        |        |        | 3694   | 5299   |        | 2808   | 4410   | 6389   |        |        |        |        | 3428   | 4689   | 7403   | 6131   | 3515   |        | 811    |      |
| Desulfobulbaceae             |        |        |        |       |        |        |        |        |        | 1820   |        |        |        |        |        |        |        |        |        |        |        |        |        |        |        |        |      |
| Desulfobulbaceae             |        | 2055   |        |       |        |        |        |        |        |        |        |        |        |        |        |        |        |        |        |        |        |        |        |        | 2620   |        |      |
| Desulfuromonadaceae          | 4185   | 4650   | 3866   | 2325  | 2280   | 3387   | 3795   | 3017   | 3984   | 3053   | 4134   | 4400   | 2035   | 3369   | 3340   |        |        |        |        | 2692   | 3254   | 3719   | 2653   |        |        |        |      |
| Gammaproteobacteria          | 2738   | 3220   | 3136   | 2608  | 2054   | 2683   | 2685   | 2817   | 3526   | 2377   | 3536   | 2626   | 1885   | 2660   | 3064   | 3238   |        |        |        | 3060   | 3199   | 3881   | 3447   | 3848   | 3476   | 5336   |      |
| Gammaproteobacteria          |        |        |        | 1936  |        |        | 2352   | 2361   | 2434   |        | 4140   | 2690   |        |        | 2379   |        |        |        |        |        |        |        |        |        |        |        |      |
| Glaciecola sp.               |        |        |        |       |        |        |        |        |        |        |        |        |        |        |        |        |        |        |        |        |        |        |        |        |        |        |      |
| OM60                         | 4080   | 4431   | 5886   | 5499  | 4631   | 4531   | 6326   | 5867   | 8698   | 5586   | 6773   | 3709   | 3836   | 4349   | 4737   | 3355   | 2156   |        |        | 3170   | 3138   | 3798   | 2729   | 3826   |        | 6031   | 1032 |
| <i>Congregibacter</i> sp.    |        |        |        |       |        |        |        |        |        |        |        |        |        |        |        |        |        |        |        |        |        | 3824   |        | 5870   |        |        |      |
| Piscirickettsiaceae          | 7709   | 8904   | 9141   | 6846  | 6287   | 5879   | 6506   | 6892   | 10044  | 7961   | 8407   | 6191   | 5581   | 7711   | 7722   | 8654   | 5295   | 4023   | 8378   | 8190   | 9810   | 7693   | 9594   | 8475   | 13784  | 2051   |      |
| Marinicellaceae              | 4893   | 4342   | 4615   | 3306  | 2722   | 3448   | 3861   | 3842   | 5154   | 4257   | 4645   | 3878   | 3907   | 5220   | 4609   | 5599   | 3255   | 2026   | 5025   | 5084   | 6098   | 5428   | 7419   | 6389   | 10863  | 1369   |      |
| <i>Marinicella</i> sp.       | 2471   | 2200   | 2714   | 1863  |        |        |        |        |        |        |        | 2367   |        |        |        |        |        |        |        |        |        |        |        |        |        |        |      |
| SR1                          |        |        |        |       |        |        |        |        |        |        |        |        |        |        |        |        |        |        |        |        |        |        |        |        |        |        |      |
| TM7-1                        |        |        |        |       |        |        |        |        |        | 2655   |        |        |        |        |        |        |        |        |        | 2814   |        | 2254   |        |        |        |        |      |
| Verrucomicrobiaceae          |        |        |        | 2675  | 1972   |        | 2635   | 1741   | 2674   |        |        |        |        |        |        |        |        |        |        |        |        |        |        |        |        |        |      |
| <i>Luteolibacter</i> sp.     |        |        | 3001   | 2076  |        |        |        |        |        |        |        |        |        |        | 1877   |        |        |        |        |        |        |        |        |        |        |        |      |
| KSB4                         | 4166   | 4532   | 3884   | 2710  | 2277   | 2891   | 2366   | 1964   |        | 4221   | 4516   | 3576   | 2523   | 3417   | 4483   |        |        |        |        | 2989   | 3365   | 4411   | 3755   | 4343   | 3962   |        | 868  |
| B-42 sp.                     |        |        |        |       |        |        |        |        |        |        |        |        |        |        |        |        |        |        |        |        |        |        |        |        |        |        |      |
| <i>GBl-58</i> sp.            |        |        |        |       |        |        |        |        |        |        |        |        |        |        |        |        |        |        |        |        |        |        | 4789   | 7282   | 5266   | 12010  | 917  |
| Minor 1%                     | 102194 | 90725  | 97851  | 74705 | 78710  | 97172  | 81166  | 68353  | 89828  | 81719  | 102634 | 86683  | 78073  | 102191 | 91688  | 94533  | 70823  | 54154  | 102599 | 103161 | 126410 | 101842 | 126153 | 103965 | 197100 | 27990  |      |
| SUM                          | 122778 | 109514 | 118731 | 96365 | 102989 | 102635 | 120253 | 101510 | 140775 | 113919 | 121680 | 1E+05  | 109026 | 131988 | 125806 | 165704 | 140445 | 107976 | 141724 | 126295 | 160825 | 152184 | 192197 | 150611 | 335209 | 43701  |      |

| Taxa                  | H6-3a  | H6-3b  | H6-3c  | H6-1a | H6-1b  | H6-1c | H6-6a  | H6-6b  | H6-6c  | H12-3a | H12-3b | H12-3c | H12-1a | H12-1b | H12-1c | H12-6a | H12-6b | H12-6c | H18-3a | H18-3c | H18-6a | H18-6b | H18-6c | H18-1a | H18-1b | H18-1c |      |
|-----------------------|--------|--------|--------|-------|--------|-------|--------|--------|--------|--------|--------|--------|--------|--------|--------|--------|--------|--------|--------|--------|--------|--------|--------|--------|--------|--------|------|
| Bacteria              | 4696   | 5160   | 4264   | 3167  | 2812   | 2547  | 4243   | 2415   | 4056   | 6175   | 4151   | 3728   | 2313   |        |        | 4371   | 4243   | 4351   | 3567   | 5238   | 4168   | 4888   | 7061   | 3788   | 2645   | 5305   |      |
| Bacteroidetes         | 2512   | 2621   | 2246   |       |        |       |        |        |        |        |        |        |        |        |        |        |        |        | 1831   |        |        |        | 2842   |        |        | 2892   |      |
| Bacteroidales         |        |        |        |       |        |       |        |        |        |        |        |        |        |        |        |        |        |        |        |        |        |        |        |        |        |        |      |
| Bacteroidales         |        |        |        |       |        |       |        |        |        |        |        | 2305   |        |        |        |        |        |        |        |        |        | 2378   | 3013   |        |        | 2967   |      |
| Flammeovirgaceae      |        |        |        |       |        |       |        |        |        |        |        |        |        |        |        |        |        |        |        |        |        |        |        |        |        |        |      |
| SB-1                  |        | 4222   |        |       |        | 1811  |        |        | 2963   |        | 2612   | 2487   |        |        |        |        |        |        |        |        |        |        |        |        |        |        |      |
| Flavobacteriaceae     | 19941  | 17610  | 16572  | 14967 | 18514  | 13961 | 17633  | 16566  | 22544  | 42377  | 22651  | 22017  | 21878  | 23659  | 21257  | 9561   | 11000  | 10350  | 12540  | 12658  | 10859  | 13654  | 16793  | 18880  | 14137  | 19495  |      |
| Eudoraeia driadica    | 17040  | 11306  | 16201  | 17393 | 15143  | 14403 | 12200  | 16270  | 15407  | 27743  | 15330  | 13389  | 16959  | 20922  | 19165  | 14520  | 23396  | 18190  | 8076   | 12397  | 9805   | 10975  | 9353   | 15304  | 14007  | 15178  |      |
| Lutibacteriisp.       |        |        |        |       | 2078   | 1774  | 2302   |        | 2964   |        |        |        |        |        |        |        |        |        |        |        |        |        |        |        |        |        |      |
| Lutibacteriitoralis   | 3096   |        | 4345   |       |        |       |        |        |        |        |        |        |        |        |        |        |        |        |        |        |        |        |        |        |        |        |      |
| Lutimonasisp.         |        |        |        | 2498  | 3001   | 2686  | 2617   | 2662   | 3387   | 5071   | 2618   | 2601   | 3068   | 3256   | 3082   |        |        |        |        |        |        |        |        | 2878   | 2243   | 3794   |      |
| Robiginitalea         | 6637   | 6784   | 4716   | 6984  | 6226   | 4965  | 7075   | 11386  | 10005  | 21603  | 11545  | 11308  | 26628  | 35082  | 28210  | 27665  | 39317  | 28013  | 17439  | 20458  | 18828  | 25783  | 24859  | 42373  | 34028  | 37752  |      |
| Ulvibacteriisp.       |        |        |        | 2404  | 3017   | 2010  |        | 1639   | 2242   |        |        |        |        |        |        |        |        |        |        |        |        |        |        |        |        |        |      |
| Saprospiraceae        | 6813   | 5462   | 6357   | 4967  | 5641   | 5148  | 5764   | 3941   | 6046   | 9297   | 5655   | 4818   | 3715   | 3758   | 3879   | 3751   | 4215   | 3721   | 5108   | 4418   | 4035   | 4581   | 6739   | 5629   | 4012   | 6948   |      |
| CFB-26                |        |        |        |       |        |       |        |        |        |        |        |        |        |        |        |        |        |        |        |        |        |        |        |        |        |        |      |
| Caldilineaceae        |        |        |        |       |        |       |        |        |        |        |        |        |        |        |        | 2538   | 2255   |        | 1936   |        | 3192   |        | 3253   | 2986   | 1744   | 3402   |      |
| GCA004                | 9856   | 7470   | 9318   | 5411  | 4417   | 3661  | 8232   | 3427   | 9428   | 11444  | 7788   | 7890   | 6230   | 4762   | 4364   | 6040   | 5825   | 4178   | 5621   | 9246   | 8274   | 12288  | 13101  | 8150   | 4548   | 12136  |      |
| Ellin6529             |        |        |        |       |        |       |        |        |        |        |        |        |        |        |        |        |        |        | 1899   |        |        |        |        |        |        |        |      |
| A4b                   | 4083   |        | 2907   | 2184  |        | 2347  |        |        | 2621   |        |        |        |        |        |        | 2833   | 2259   | 2132   | 2821   | 4218   | 2869   | 2683   | 3900   |        |        |        |      |
| Stramenopiles         |        | 5324   |        |       |        |       | 4873   | 2458   |        | 3950   |        | 2420   |        |        |        |        |        |        |        |        |        |        |        |        |        |        |      |
| Planktothrixisp.      |        |        |        |       |        |       |        |        |        |        |        |        |        |        |        | 13680  | 11667  | 6162   | 1730   |        |        |        |        |        |        |        |      |
| CL500-15              |        | 2512   |        |       |        |       |        |        |        |        | 2436   | 2424   |        |        |        |        |        |        |        |        | 2081   |        | 2344   |        | 3079   | 2327   | 2860 |
| agg27                 |        | 2397   |        | 1939  |        |       | 2404   | 2112   | 2649   | 3765   |        | 2300   |        | 2178   |        | 1858   | 2648   |        | 1922   |        | 1871   |        |        | 2443   | 2140   |        |      |
| Phycisphaerales       | 2746   | 3182   | 2594   | 2568  | 2301   |       | 3443   | 2388   | 3701   | 4224   | 2912   | 3633   |        |        |        | 2742   | 3699   | 2608   | 3112   | 3428   | 2503   | 2994   | 3792   | 3150   | 2634   | 3131   |      |
| Phycisphaeraceae      |        | 3238   |        |       | 2444   |       | 2448   | 2642   | 2838   | 7161   | 4025   | 4131   |        | 2780   |        |        |        |        | 2023   | 2381   | 3588   | 2009   |        | 3161   | 2792   |        |      |
| Pirellulaceae         |        |        |        | 2175  |        |       | 2090   |        |        |        |        | 2196   |        |        | 2230   | 2722   | 2739   |        | 2932   |        | 3655   | 4085   | 4069   | 3206   | 2190   | 3692   |      |
| Rhodobacteraceae      | 3539   | 2891   | 2690   | 2845  | 3365   | 2984  | 2619   | 3373   | 2741   | 7170   | 3946   | 3967   | 4612   | 5536   | 5368   | 3333   | 4287   | 2163   | 3398   | 2478   | 3265   | 5689   | 3496   | 4009   | 3334   | 4598   |      |
| Loktaneliaisp.        | 3763   | 2473   | 2778   | 4080  | 4696   | 4369  | 2477   | 4644   | 3137   | 8176   | 4803   | 4441   | 5583   | 6613   | 6864   | 2476   | 3606   | 3056   | 1892   | 2420   | 2226   | 2821   |        | 3379   | 2589   |        |      |
| Hydrogenaphaga        |        |        |        | 2071  | 3206   | 3728  |        |        |        |        |        |        |        |        |        |        |        |        |        |        |        |        |        |        |        |        |      |
| Methylotenera mobilis |        |        |        |       |        |       |        |        |        | 3856   |        |        |        | 2218   |        |        |        |        |        |        |        |        |        |        |        |        |      |
| Desulfobacteraceae    |        | 5228   |        |       |        |       |        |        |        | 4669   | 4404   | 5249   | 3801   | 2019   |        |        |        |        | 1885   | 3245   | 3254   | 6768   | 10338  | 2895   |        | 5938   |      |
| Desulfobulbaceae      |        | 2454   |        |       |        |       |        |        |        | 4319   | 2379   | 2337   |        |        |        |        |        |        |        |        |        |        | 2927   |        |        |        |      |
| Desulfobulbaceae      |        |        |        |       |        |       |        |        |        |        |        |        |        |        |        |        |        |        |        |        |        | 2790   | 3671   |        |        | 2971   |      |
| Desulfuromonadaceae   | 3672   | 3597   | 4360   | 2344  | 2061   | 2857  | 3862   |        | 4948   | 5300   | 3830   | 4006   | 2471   |        |        |        |        |        | 2158   | 2299   | 1973   | 2820   | 3879   |        |        | 2795   |      |
| Gammaproteobacteria   | 3373   | 4318   | 2840   | 2878  | 2556   | 1944  | 3288   | 2474   | 3115   | 4673   | 3435   | 3306   |        |        | 2150   | 2123   | 2491   | 2456   | 2492   | 3169   | 2683   | 2708   | 3814   |        | 1781   | 3197   |      |
| Gammaproteobacteria   | 3119   | 5926   |        |       |        |       | 4545   | 2090   |        |        |        |        |        |        |        |        |        | 3483   |        |        |        |        |        |        |        |        |      |
| Glaciecola            | 3664   | 2618   |        |       |        |       |        |        |        |        |        |        |        |        |        |        |        |        |        |        |        |        |        |        |        |        |      |
| OM60                  | 5036   | 7715   | 3909   | 4923  | 5396   | 5161  | 6602   | 5637   | 7586   | 11081  | 7455   | 6830   | 3540   | 4787   | 4083   | 1896   | 2442   | 2096   | 2313   | 2193   | 2171   | 2717   | 3448   | 2974   | 2154   | 4164   |      |
| Congregibacterisp.    |        |        |        |       |        |       |        |        |        |        |        |        |        |        |        |        |        |        |        |        |        |        |        |        |        |        |      |
| Piscirickettsiaceae   | 8109   | 9990   | 7313   | 7209  | 7235   | 5042  | 8226   | 6147   | 9029   | 15342  | 10259  | 9815   | 5197   | 5923   | 6765   | 5366   | 7113   | 6011   | 7385   | 8135   | 6874   | 6542   | 9125   | 5954   | 4649   | 8681   |      |
| Marinicellaceae       | 4746   | 4829   | 4036   | 3435  | 3758   | 3401  | 4543   | 2337   | 4015   | 6266   | 5739   | 5347   | 3646   | 3519   | 4181   | 2792   | 3138   | 2966   | 3658   | 3918   | 4131   | 5989   | 7554   | 4461   | 2835   | 6213   |      |
| Marinicella           | 2935   |        | 2382   | 1999  | 2497   |       |        |        |        |        |        |        |        |        |        |        |        |        |        |        |        |        |        |        |        |        |      |
| SR1                   |        |        |        |       |        |       |        |        |        |        |        |        |        |        |        | 2704   | 2453   | 2214   | 1768   |        |        |        |        |        |        |        |      |
| TM7-1                 |        |        |        |       |        |       |        | 1731   |        | 3678   |        |        |        |        |        |        |        |        |        |        |        |        |        |        |        |        |      |
| Verrucomicrobiaceae   |        |        |        | 1959  | 2134   | 2504  | 2366   | 3364   |        |        |        |        |        |        |        |        |        |        |        |        |        |        |        |        |        |        |      |
| Luteolibacterisp.     |        |        |        | 2306  | 2726   |       | 1782   |        |        |        |        |        |        | 2322   | 2476   |        |        |        |        |        |        |        |        |        |        |        |      |
| KSBA                  | 3547   | 4188   | 3719   | 2305  | 1911   | 2577  | 2515   |        | 3822   | 5579   | 4337   | 5576   | 2562   | 2331   |        |        |        |        | 2179   | 3158   | 2073   | 3817   | 4661   | 3194   | 1702   | 4864   |      |
| B-42                  |        |        |        |       |        |       |        |        |        |        |        |        |        |        |        |        |        |        | 1812   | 2251   | 2632   | 2468   | 2966   | 3123   | 2321   |        |      |
| GBI-58                |        |        |        |       |        |       |        |        |        |        |        |        |        |        |        |        |        |        |        |        |        |        |        | 3433   | 2437   |        |      |
| Minor                 | 102585 | 104596 | 93280  | 77092 | 78636  | 74916 | 88274  | 60377  | 90718  | 136838 | 91027  | 92616  | 86495  | 84360  | 89723  | 69965  | 74887  | 69556  | 69049  | 81796  | 75316  | 93080  | 115110 | 78015  | 56544  | 105907 |      |
| SUM                   | 122923 | 133515 | 103547 | 14105 | 106715 | 92606 | 116367 | 101485 | 129244 | 222919 | 132310 | 141074 | 112971 | 138793 | 108436 | 103855 | 115335 | 105291 | 131782 | 154654 | 148449 | 113249 | 162973 |        |        |        |      |

**Figure S2:** Relative abundance of bacterial community compositions for 54 sediment samples at species level, including taxonomic identification for all sequences, including both the major (>1% of the total bacterial community) and minor (<1% of the total bacterial community) species. The species legend can be viewed at [http://www.cgr.liv.ac.uk:8088/illum/eco\\_e57c8f17b78a3e4/](http://www.cgr.liv.ac.uk:8088/illum/eco_e57c8f17b78a3e4/)

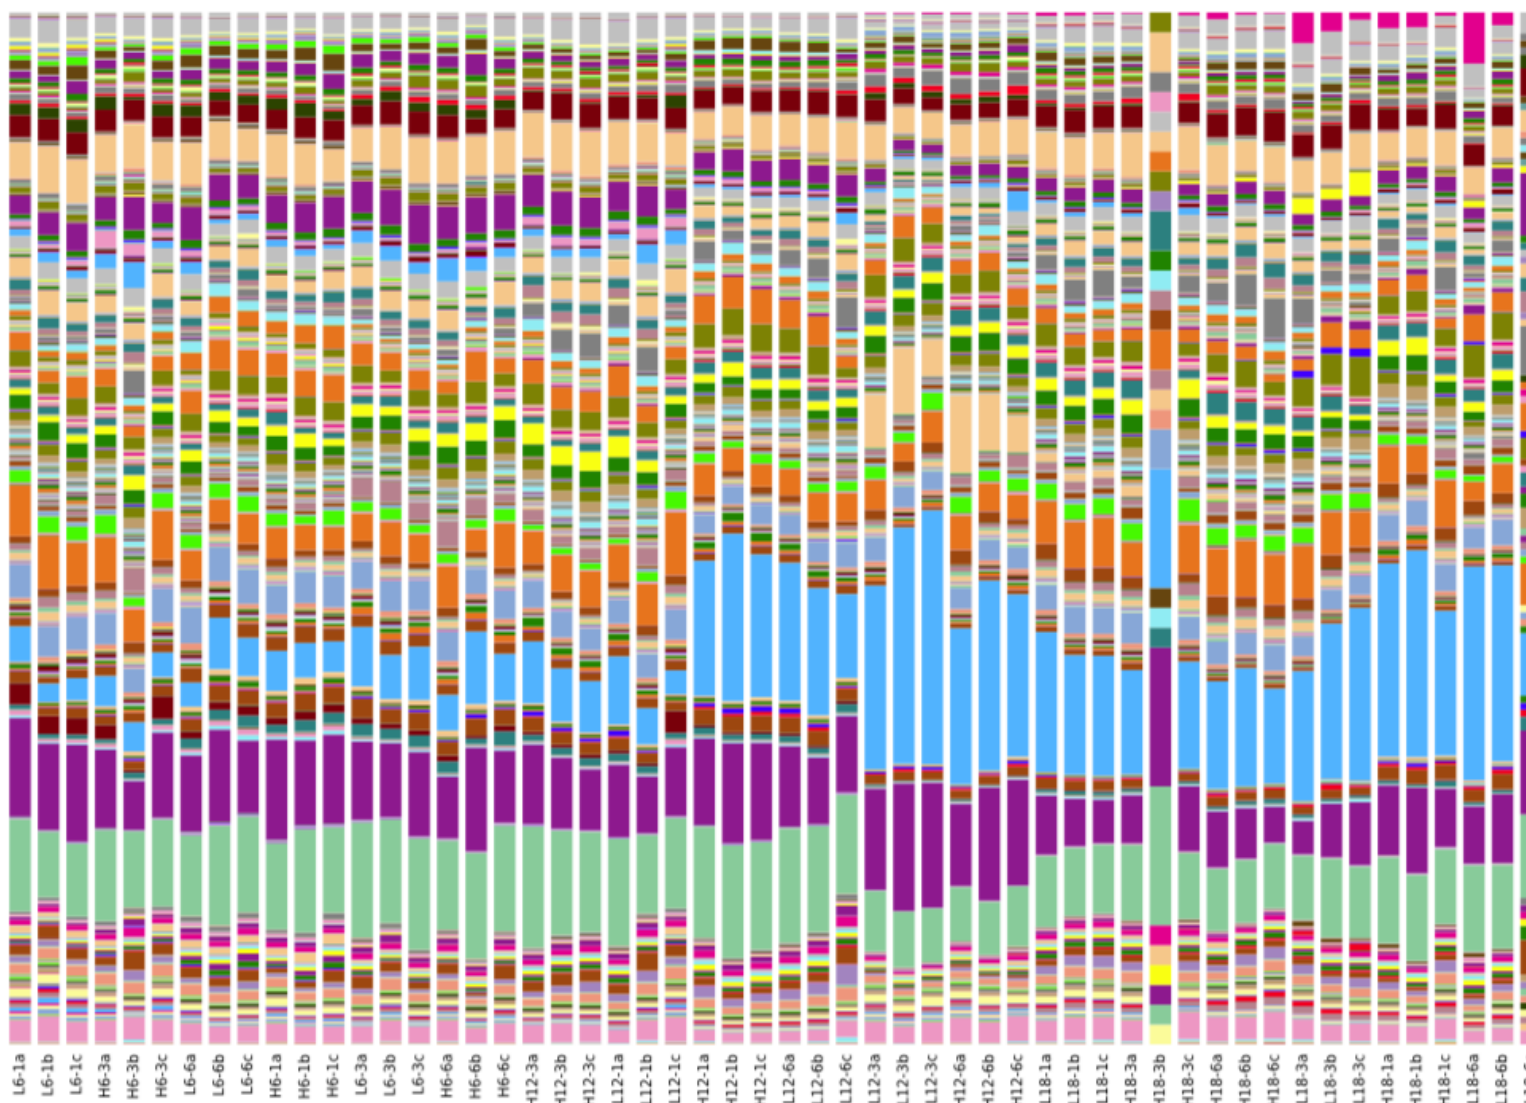



**Figure S3:** Alpha diversity rarefaction curves, showing (a) observed species (b) phylogenetic diversity and (c) Chao1 diversity estimate for all sediment samples.

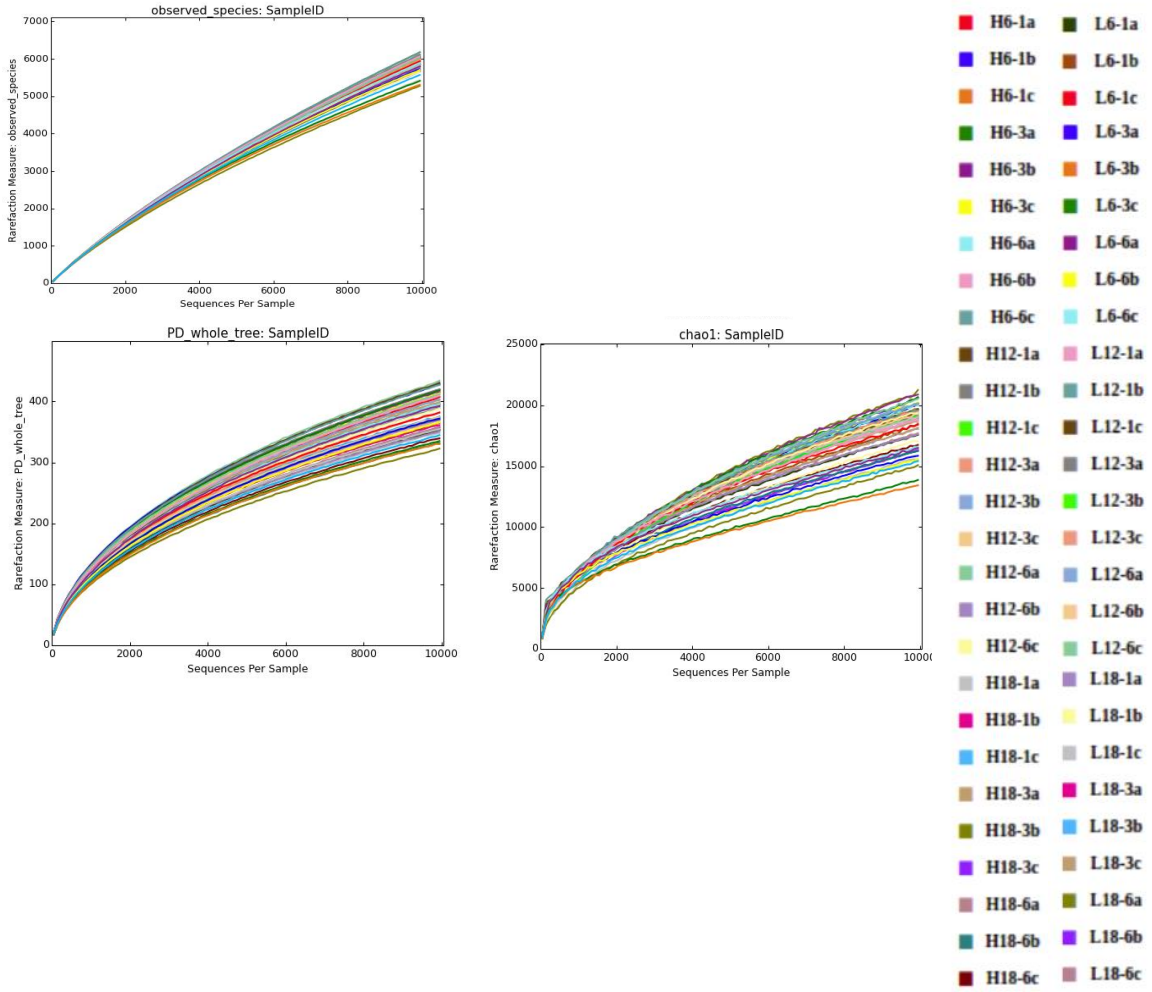

**Table S4:** Values for observed OTU richness, predicted richness using the Chao1 estimator and phylogenetic distance when sequence sample size was normalized to 9,950 sequences per sample.

| Sample | Observed Richness | Chao1  | Phylogenetic Distance |
|--------|-------------------|--------|-----------------------|
| L6-1a  | 6,014             | 20,142 | 407.44                |
| L6-1b  | 6,054             | 20,125 | 428.13                |
| L6-1c  | 5,951             | 19,688 | 402.49                |
| H6-3a  | 6,075             | 20,664 | 418.15                |
| H6-3b  | 6,040             | 20,877 | 415.58                |
| H6-3c  | 5,987             | 20,234 | 413.37                |
| L6-6a  | 5,954             | 20,012 | 399.35                |
| L6-6b  | 5,873             | 18,913 | 368.90                |
| L6-6c  | 5,961             | 20,120 | 389.24                |
| H6-1a  | 6,045             | 19,347 | 395.33                |
| H6-1b  | 5,850             | 19,320 | 370.02                |
| H6-1c  | 5,819             | 18,988 | 372.78                |
| L6-3a  | 5,962             | 19,400 | 382.24                |
| L6-3b  | 6,066             | 20,151 | 403.60                |
| L6-3c  | 5,910             | 19,307 | 374.01                |
| H6-6a  | 6,033             | 20,510 | 411.77                |
| H6-6b  | 5,795             | 17,614 | 350.83                |
| H6-6c  | 5,906             | 19,348 | 388.31                |
| H12-3a | 5,840             | 19,047 | 354.48                |
| H12-3b | 5,866             | 19,600 | 361.11                |
| H12-3c | 5,931             | 19,640 | 375.37                |
| L12-1a | 5,821             | 18,627 | 353.17                |
| L12-1b | 6,084             | 21,245 | 414.31                |
| L12-1c | 5,981             | 20,595 | 419.63                |
| H12-1a | 5,908             | 17,708 | 358.39                |
| H12-1b | 5,712             | 16,235 | 331.64                |
| H12-1c | 5,786             | 16,739 | 339.39                |
| L12-6a | 5,860             | 17,566 | 353.25                |
| L12-6b | 5,904             | 18,402 | 364.87                |
| L12-6c | 5,937             | 18,461 | 381.66                |
| L12-3a | 5,728             | 15,848 | 371.77                |
| L12-3b | 5,310             | 13,424 | 330.09                |
| L12-3c | 5,410             | 13,865 | 334.96                |
| H12-6a | 5,799             | 16,494 | 392.31                |
| H12-6b | 5,708             | 15,586 | 365.63                |
| H12-6c | 5,886             | 16,586 | 395.45                |
| L18-1a | 6,070             | 18,729 | 409.47                |
| L18-1b | 6,179             | 19,564 | 427.13                |
| L18-1c | 6,181             | 19,674 | 430.54                |
| H18-3a | 6,114             | 19,139 | 419.28                |
| H18-3b | N/A               | N/A    | N/A                   |
| H18-3c | 6,070             | 18,794 | 419.21                |
| H18-6a | 5,995             | 18,833 | 407.53                |
| H18-6b | 5,998             | 19,110 | 409.18                |
| H18-6c | 6,125             | 20,005 | 433.92                |
| L18-3a | 5,775             | 18,145 | 394.30                |
| L18-3b | 5,656             | 17,055 | 364.73                |
| L18-3c | 5,427             | 15,518 | 348.38                |
| H18-1a | 5,678             | 16,290 | 353.99                |
| H18-1b | 5,570             | 15,417 | 344.71                |
| H18-1c | 5,984             | 18,045 | 398.59                |

## Supplementary Material

|        |       |        |        |
|--------|-------|--------|--------|
| L18-6a | 5,277 | 15,079 | 322.62 |
| L18-6b | 5,657 | 16,337 | 357.51 |
| L18-6c | N/A   | N/A    | N/A    |



**Figure S4 (b):** Non-metric multidimensional scaling plots of bacterial community composition with labels coloured according to temperature fluctuation: 1 °C (red), 3 °C (green) and 6 °C (blue).

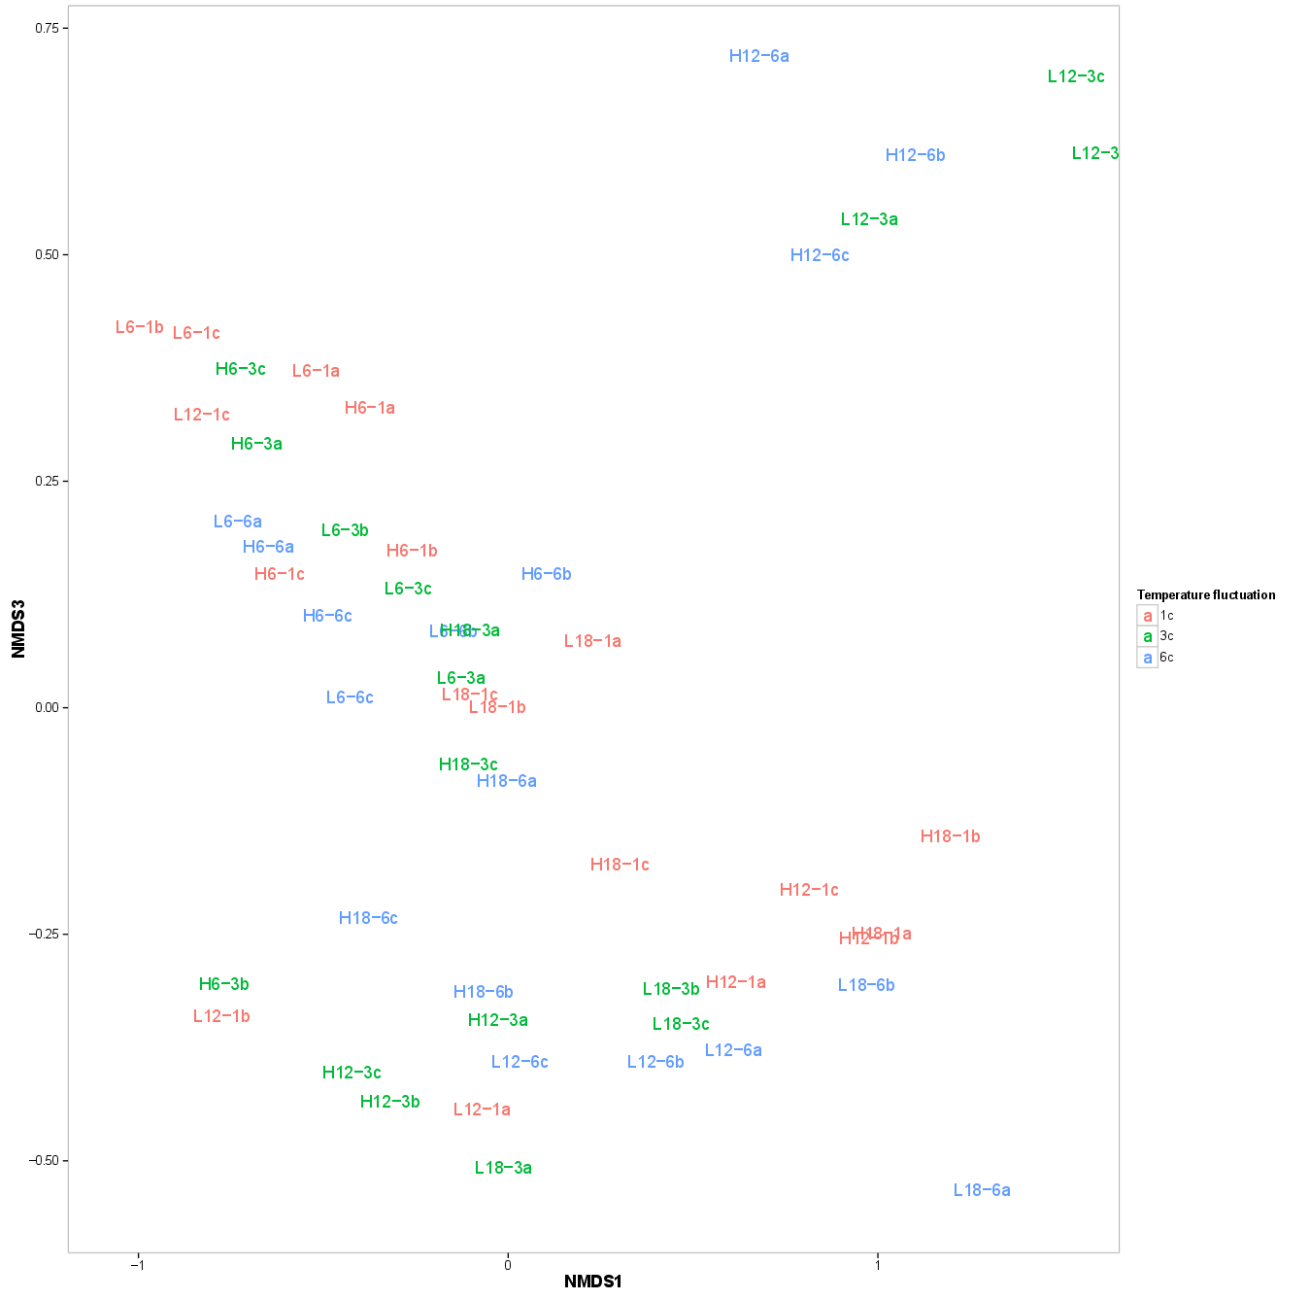

**Detailed methodology***16S rRNA gene amplification and sequencing*

Amplicon generation using the primers  
 5'ACACTCTTTCCCTACACGACGCTCTTCCGATCTNNNNNGTGCCAGCMGCCG  
 CGGTAA3' and  
 5'GTGACTGGAGTTCAGACGTGTGCTCTTCCGATCTGGACTACHVGGGTWTCT  
 AAT3'

(targeting the 16S rRNA gene) was performed for each of the 54 environmental DNA samples. These were amplified by 10 cycles of PCR using the Kapa enzyme. The samples were then cleaned using a 1:1 ratio of AMPure XP beads on a Tecan Evo150 robot. The samples then underwent a further round of PCR, during which the barcode indexes and Illumina adapters were incorporated into the final PCR products. Fifteen cycles were performed using the Kapa enzyme and the samples cleaned again using a 1:1 ratio of AMPure XP beads on the Tecan robot.

The DNA concentrations were recorded using a Qubit fluorometer (ThermoFisher) and scanned on the Fragment Analyser (Advanced Analytical) and this data was used to pool the samples. The pooled sample was then size-selected at 350-650 base pairs (bp) using the Pippin Prep (Sage). The size-selected sample was then cleaned using Ampure XP beads and the quality and quantity of the pool was assessed again using Qubit and the Fragment Analyser and subsequently by qPCR using the Illumina Library Quantification Kit from Kapa on a Roche Light Cycler LC48011 according to manufacturer's instructions. The template DNA was denatured according to the protocol described in the

Illumina cBot user guide and loaded at a concentration of 8.5 pM. To increase sample diversity 15% PhiX was spiked into the sample. The sequencing was carried out on one lane of an Illumina MiSeq at 2x250 base pair (bp) paired-end sequencing with v2 chemistry. Sequences are published in the European Nucleotide Archive (ENA) under the study accession number PRJEB13670 and sample accession numbers ERS1124371-ERS1124422.

*Initial processing and quality assessment of the sequence data*

Quality control and processing of the pooled amplicon sample (including indexes and the addition of Illumina adaptors) was followed by paired-end sequencing (2x250 bp) using the Illumina MiSeq platform at the University of Liverpool Centre for Genomic Research NERC Biomolecular Analysis Facility. Fragmented PhiX phage was added to the sequence library in order to increase the sequence complexity. PhiX sequences are not indexed, so should not be associated with indexed reads after de-multiplexing. However, a small proportion of PhiX reads can become associated with an index (probably due to 'cross-talk' between adjacent clusters on the sequencing flowcell). To remove these sequences, each sample was compared with the complete PhiX sequence (GenBank gi9626372) using BLASTn (Altschul et al., 1990). Sequences matching PhiX (E-value <  $10^{-5}$ ) were filtered out of the dataset. A custom script was used to exclude sequences with lengths outside of the expected range (< 200 bp or > 350 bp), which are likely to represent errors.

Initial processing and quality assessment of the sequence data was performed using an in-house pipeline developed by Dr Richard Gregory at the University of Liverpool Centre for Genomic Research. Briefly, basecalling and de-multiplexing of indexed reads was performed by CASAVA version 1.8.2 (Illumina) to produce 70 samples from the single flowcell, in fastq format. The raw fastq files were trimmed to remove Illumina adapter sequences using Cutadapt version 1.2.1 (Martin, 2011). The option “-O 3” was set, so the 3' end of any reads which matched the adapter sequence over at least 3 bp was trimmed off. The reads were further trimmed to remove low quality bases, using Sickle version 1.200 with a minimum window quality score of 20. After trimming, reads shorter than 10 bp were removed. If both reads from a pair passed this filter, each was included in the R1 (forward reads) or R2 (reverse reads) file. If only one of a read pair passed this filter, it was included in the R0 (unpaired reads) file. FLASH version 1.2.8 (Magoc and Salzberg, 2011) was used to assemble each pair of reads into a single sequence representing the complete amplicon. Read pair sequences were assembled into single sequences spanning the amplicon and filtered for sequences derived from PhiX phage (routinely added to the sequence libraries).

#### *Grouping sequences into operational taxonomic units*

A metadata file was created to describe each sample. These two files were used for metagenomic analysis using Qiime, version 1.8.0 (Caporaso et al., 2010b). To correct incorrect clustering resulting in overestimation of the number of OTUs, an error calculation was run by clustering sequences at 99% identify and generating a consensus sequence for the cluster. Additionally chimera detection used a dataset of 16 rRNA genes



as potential ‘parent’ sequences in addition to using the most common sequences in the dataset. Both filters were run as a single step using the USEARCH7 “uchime\_ref” option using the Greengenes database of ribosomal RNA sequences, version 12.8 (McDonald et al., 2012) as a comparison set of reference sequences for chimera detection.

The first chimera detection step used a database of 16S rRNA genes as potential “parent” sequences from which chimeras may be derived. The second used the most common sequences in the data itself as potential “parent” sequences (hence *de novo*). There were 582,651 sequence clusters that passed the chimera filters. Errors are expected to be rare compared to corrected sequences, therefore, clusters containing few sequences are more likely to be the result of errors compared to clusters containing many sequences.

Post-processing of the Illumina sequence reads included quality control, transfer of \*.sff data to sequence (\*.fna) and quality (\*.qual) files and clustering of reads into operational taxonomic units (OTUs) at 99% sequence identity. A minimum cluster size was set to remove clusters containing fewer than four sequences. OTU-picking was done following the Qiime script “pick\_otus.py” using USEARCH7 (Edgar et al., 2011) to cluster sequences, removing chimeras and define OTU abundance. Taxonomic assignment of each OTU was achieved using the Qiime script “assign\_taxonomy.py” using the RDP classifier (Wang et al., 2007) to match a representative sequence from the OTU to a sequence from the Greengenes database, version 12.8 (McDonald et al., 2012), clustering at 97% identify with associated taxonomic information.

*Alpha diversity and rarefaction statistical analysis*

OTU tables were repeatedly sub-sampled using the Qiime script “multiple\_rarefactions.py”. The Chao1 index was calculated using the following formula:

$$S_1 = S_{obs} + \frac{F_1^2}{2F_2}$$

Where  $S_{obs}$  was the observed number of species within a sample,  $F_1$  was the number of singleton species (species which occur once within a sample) and  $F_2$  was the number of doubletons (species which occur twice within a sample) (Chao, 1984; Colwell and Coddington, 1994).

*Beta diversity analysis including UPGMA trees and 2D-PCoA plots*

A phylogeny was achieved by generating a sequence alignment of the representative sequences of each OTU via the Qiime script “align\_seqs.py” using Pynast (Caporaso et al., 2010a) to align the sequences to a set of pre-aligned 16S rRNA sequences (bundled within Qiime). A minimum length of 150 bp and identify of 75% were the criteria for inclusion in the alignment. The alignment was filtered, using the Qiime script “filter\_alignment.py” to remove uninformative sites (based on a file of phylogenetically informative and uninformative positions in the 16S rRNA gene pre-alignment) and sites with gaps in >95% of sequences. Finally the filtered alignment was used to build a phylogeny via the Qiime script “make\_phylogeny.py” using the FastTree algorithm (Price et al., 2010).

All datasets were sub-sampled (rarefied) using the Qiime script “multiple\_rarefaction\_even\_depth.py”. These OTU tables were used to calculate weighted and unweighted pair-wise UniFrac matrices using the Qiime script “beta\_diversity.py”. UniFrac matrices were then used to generate Unweighted Pair-Group Method with Arithmetic Mean (UPMGA) trees and 2D principle coordinates plots (PCoA) using the following Qiime scripts “upgma\_cluster.py”, “consensus\_tree.py”, “tree\_compare.py”, “make\_bootstrapped\_tree.py”, “principal\_coordinates.py” and “make\_2d\_plots”.

**References**

- Altschul, S.F., Gish, W., Miller, W., Myers, E.W., and Lipman, D.J. (1990). Basic Local Alignment Search Tool. *Journal of Molecular Biology* 215(3), 403-410.
- Caporaso, J.G., Bittinger, K., Bushman, F.D., DeSantis, T.Z., Andersen, G.L., and Knight, R. (2010a). PyNAST: a flexible tool for aligning sequences to a template alignment. *Bioinformatics* 26(2), 266-267.
- Caporaso, J.G., Kuczynski, J., Stombaugh, J., Bittinger, K., Bushman, F.D., Costello, E.K., et al. (2010b). QIIME allows analysis of high-throughput community sequencing data. *Nature Methods* 7(5), 335-336.
- Chao, A. (1984). Nonparametric-Estimation of the Number of Classes in a Population. *Scandinavian Journal of Statistics* 11(4), 265-270.
- Colwell, R.K., and Coddington, J.A. (1994). Estimating Terrestrial Biodiversity through Extrapolation. *Philosophical Transactions of the Royal Society of London Series B-Biological Sciences* 345(1311), 101-118.
- Edgar, R.C., Haas, B.J., Clemente, J.C., Quince, C., and Knight, R. (2011). UCHIME improves sensitivity and speed of chimera detection. *Bioinformatics* 27(16), 2194-2200.
- Magoc, T., and Salzberg, S.L. (2011). FLASH: fast length adjustment of short reads to improve genome assemblies. *Bioinformatics* 27(21), 2957-2963.
- Martin, M. (2011). Cutadapt removes adapter sequences from high-throughput sequencing reads. *EMBnet.journal* 17(1), 10-12. doi: <http://dx.doi.org/10.14806/ej.17.1.200>.
- McDonald, D., Price, M.N., Goodrich, J., Nawrocki, E.P., DeSantis, T.Z., Probst, A., et al. (2012). An improved Greengenes taxonomy with explicit ranks for ecological and evolutionary analyses of bacteria and archaea. *Isme Journal* 6(3), 610-618.
- Price, M.N., Dehal, P.S., and Arkin, A.P. (2010). FastTree 2-Approximately Maximum-Likelihood Trees for Large Alignments. *Plos One* 5(3).
- Wang, Q., Garrity, G.M., Tiedje, J.M., and Cole, J.R. (2007). Naive Bayesian classifier for rapid assignment of rRNA sequences into the new bacterial taxonomy. *Applied and Environmental Microbiology* 73(16), 5261-5267.
